# Supplementary material for: Using a Discrete Choice Experiment to Examine the Factors Influencing Clinical Trial Participation in a Nationally Representative Sample
Source: Research Square preprint supplement (doi:10.21203/rs.3.rs-498686/v1), 2021-06-21
Supplement: Supplementary file 1 [file aa990d0e06eb88ffd4d24d5b.docx]

Suggested Reviewers

1. Dr Katie Gilles:

Email: [k.gillies@abdn.ac.uk](mailto:k.gillies@abdn.ac.uk).

1. Prof. Shaun Treweek

Email: [streweek@mac.com](mailto:streweek@mac.com)

1. Professor Mandy Ryan

Email: [m.ryan@abdn.ac.uk](mailto:m.ryan@abdn.ac.uk)
